# Supplementary material for: A multi-factor adjustable PtSe2/GaN van der Waals heterostructure with enhanced photocatalytic performance
Source: Royal Society of Chemistry journal article supplement (doi:10.1039/d3cp02167j), 2023-01-01
Supplement: d3cp02167j1.pdf [file d3cp02167j1.pdf]

# **Multi-Factor Adjustable PtSe<sub>2</sub>/GaN van der Waals Heterostructure with Enhanced Photocatalytic performance**

Qihao Zhang<sup>1</sup>, Hua Zhu<sup>1</sup>, Xiaodong Yang<sup>2</sup>, Liang Chen<sup>1</sup> and Yang Shen<sup>1, 3, \*</sup>

<sup>1</sup>*Institute of Optoelectronics Technology, China Jiliang University, Hangzhou 310018, China*

<sup>2</sup>*Key Laboratory of Ecophysics and Department of Physics, Shihezi University, Xinjiang 832003, China*

<sup>3</sup>*School of Materials Science and Engineering, Zhejiang University, Hangzhou 310027, China*

\*Correspondence and requests for materials should be addressed to Y. Shen (yshen@cjlu.edu.cn)

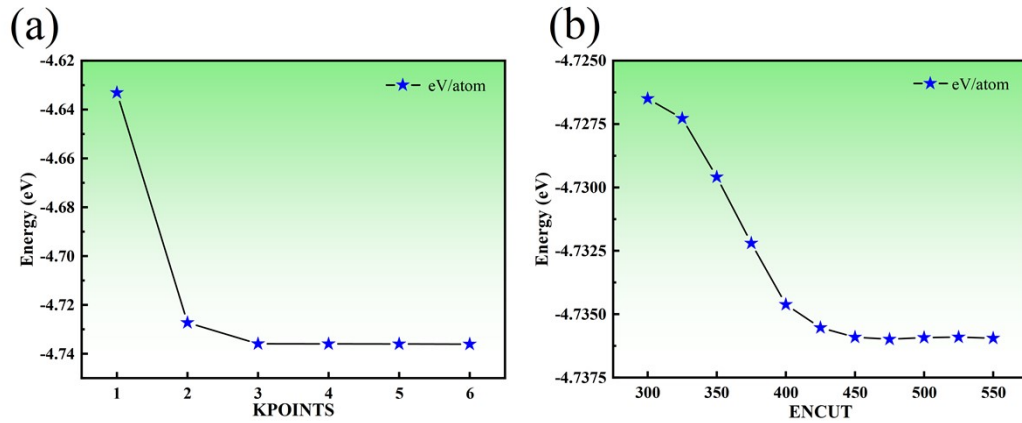

**Fig. S1.** The convergence test of (a) KPOINTS and (b) ENCUT. The Y-axis energy represents the average energy per atom.

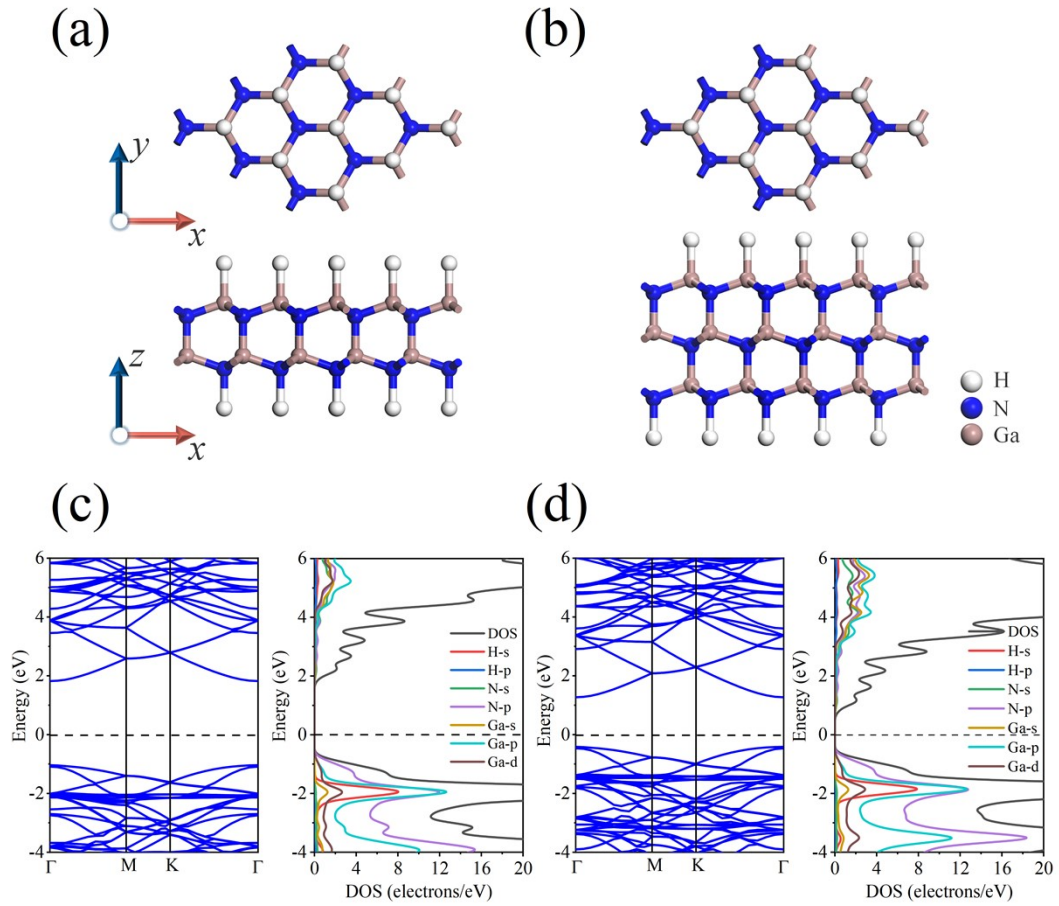

**Fig. S2.** The atomic structure of buckling GaN (a) BL and (b) TL. The upper part is a top view, and the lower part is a side view. Band structures and PDOS of buckling GaN (c) BL and (d) TL.

**Table S1**

The lattice parameter  $a$ , binding energy  $E_b$  and bandgap  $E_g$  of the PtSe<sub>2</sub> monolayer, the buckling GaN nanosheets with different thickness, and PtSe<sub>2</sub>/GaN ML heterostructures with four different configurations.

|                   | $a(\text{\AA})$ | $E_b$ (eV) | PBE<br>$E_g$ (eV) | HSE06<br>$E_g$ (eV) |
|-------------------|-----------------|------------|-------------------|---------------------|
| PtSe <sub>2</sub> | 3.75            | -          | 1.4014            | 2.1301              |
| Ga-1L             | 3.20            | -          | 3.2838            | 4.3879              |
| Ga-2L             | 3.22            | -          | 1.2942            | 2.1695              |
| Ga-3L             | 3.24            | -          | 0.1509            | 1.6858              |
| AB1               | 6.45            | -0.08      | 1.1863            | 1.8882              |
| AB2               | -               | -0.13      | 1.1846            | 1.8862              |
| AB3               | -               | -0.14      | 1.1852            | 1.8861              |
| AB4               | -               | -0.10      | 1.1869            | 1.8865              |

**Table S2**

The vacuum level  $\Phi$  of different components of the heterostructures and bandgap value of six configurations.

|       | $\Phi_{\text{GaN}}$ (eV) | $\Phi_{\text{PtSe}_2}$ (eV) | $\Delta\Phi$ (eV) | $E_g$ (eV) |
|-------|--------------------------|-----------------------------|-------------------|------------|
| Ga-1L | 1.611                    | 4.894                       | 3.283             | 1.866      |
| Ga-2L | 0.914                    | 5.483                       | 4.569             | 1.375      |
| Ga-3L | 1.000                    | 5.852                       | 4.852             | 0.477      |
| N-1L  | 6.496                    | 3.315                       | 3.181             | 1.489      |
| N-2L  | 6.576                    | 3.340                       | 3.236             | 0.356      |
| N-3L  | 6.803                    | 3.462                       | 3.341             | 0.112      |

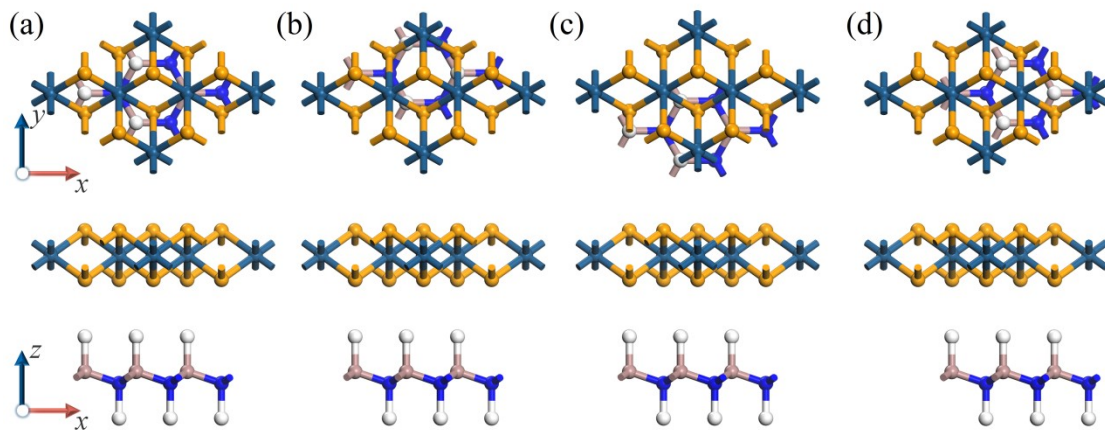

**Fig. S3.** The atomic structure of (a) AB1, (b) AB2, (c) AB3 and (d) AB4 configurations of the PtSe<sub>2</sub>/GaN heterostructures. The upper part is a top view, and the lower part is a side view.\

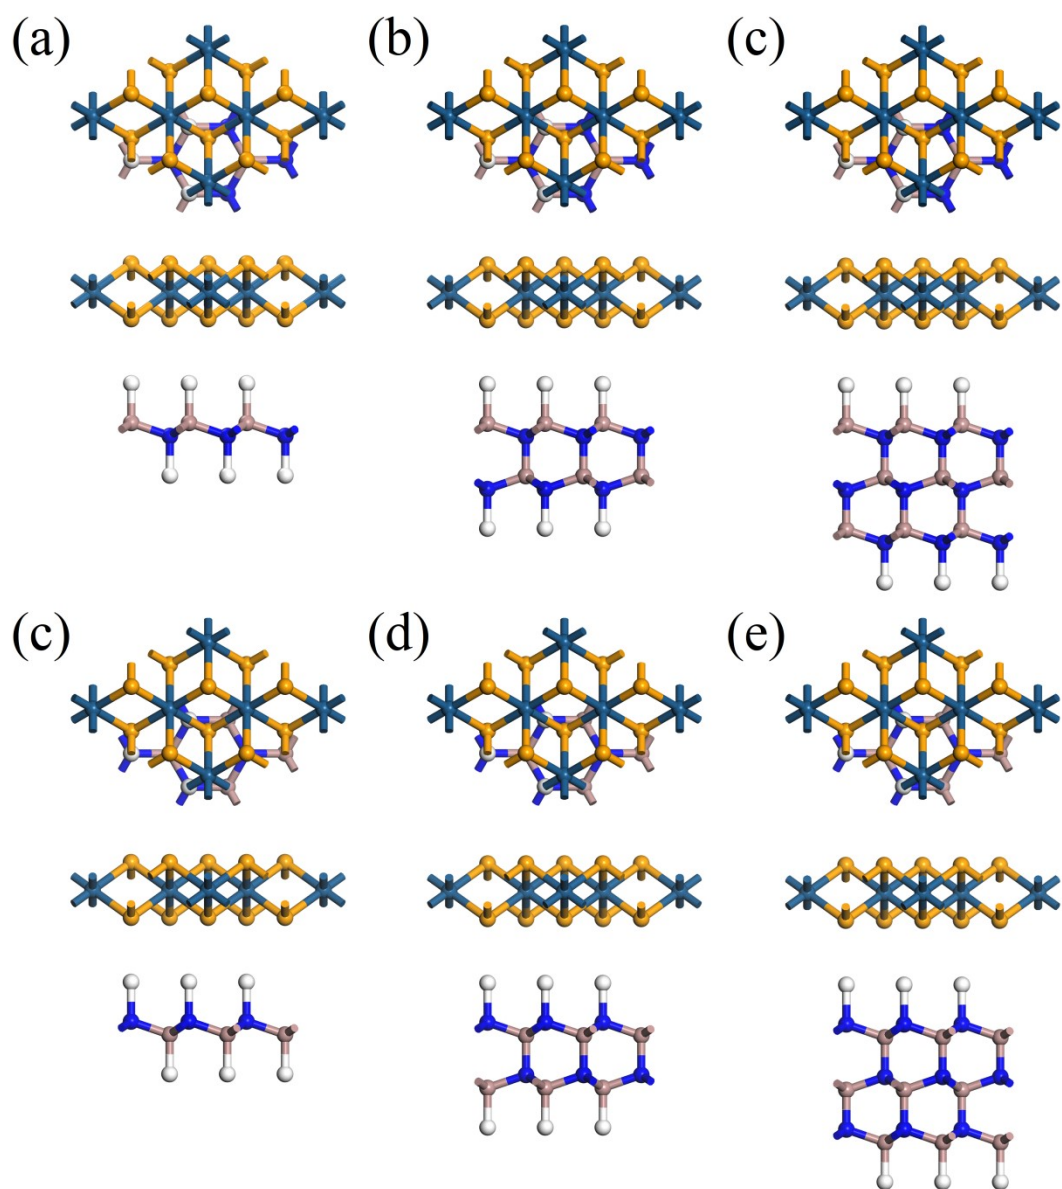

**Fig. S4.** The atomic structures of the six different heterostructures, respectively, (a) Ga-1L, (b) Ga-2L, (c) Ga-3L, (d) N-1L, (e) N-2L and (f) N-3L

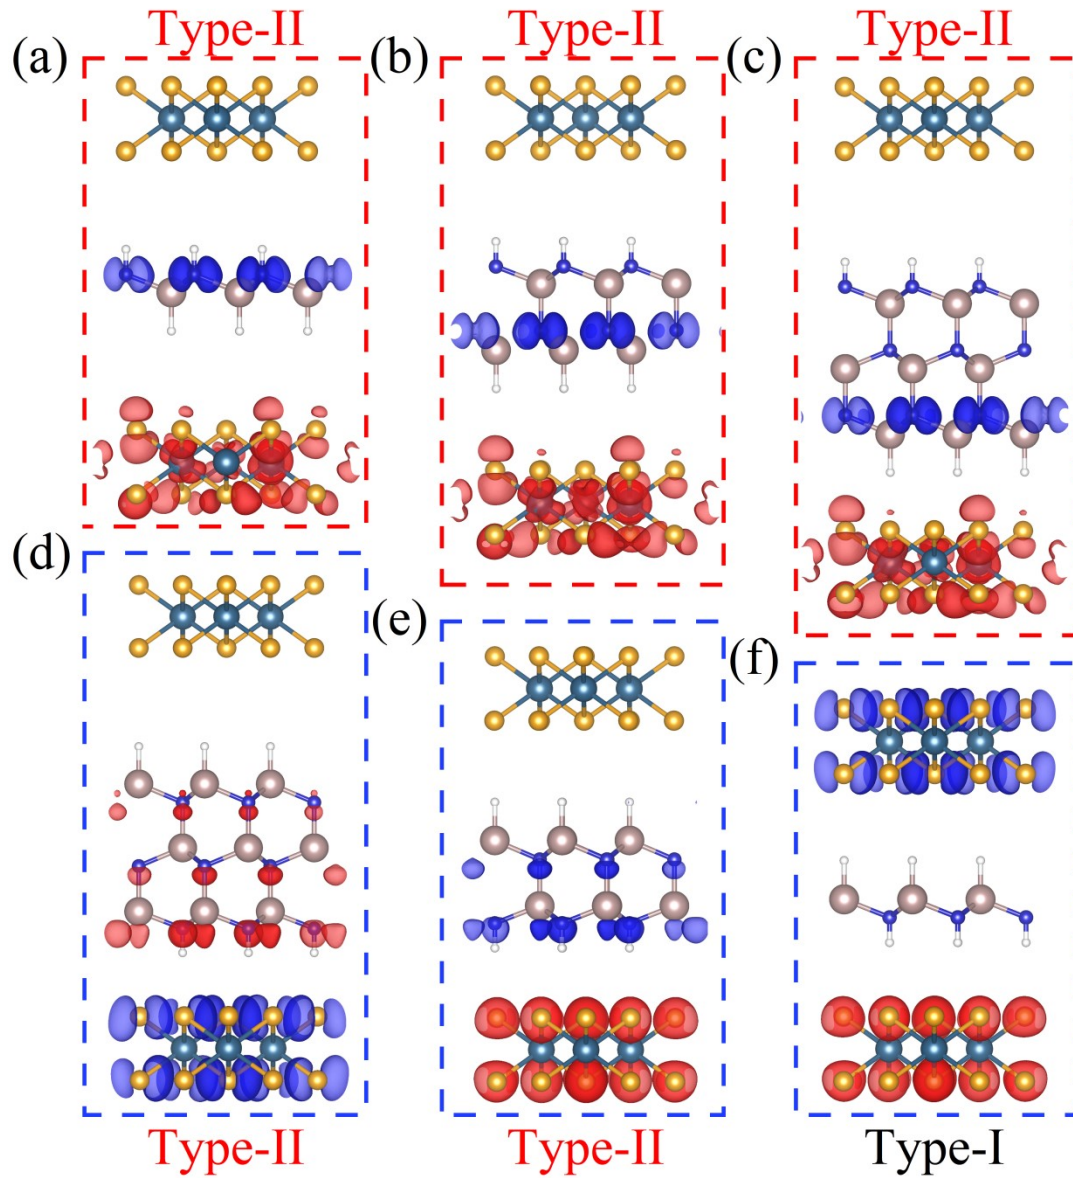

**Fig. S5.** The type of the band alignment and the band charge density distribution of CBM and VBM for the (a) N-1L, (b) N-2L, (c) N-3L, (d) Ga-3L, (e) Ga-2L and (f) Ga-1L.

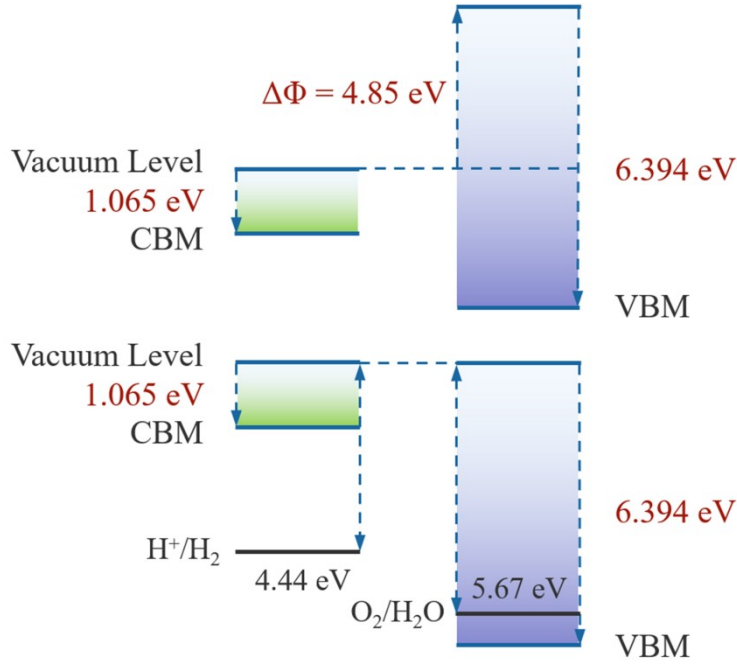

**Fig. S6.** The schematic diagram of the band alignment of Ga-3L with different vacuum levels (upper panel) and aligned vacuum levels (lower panel).

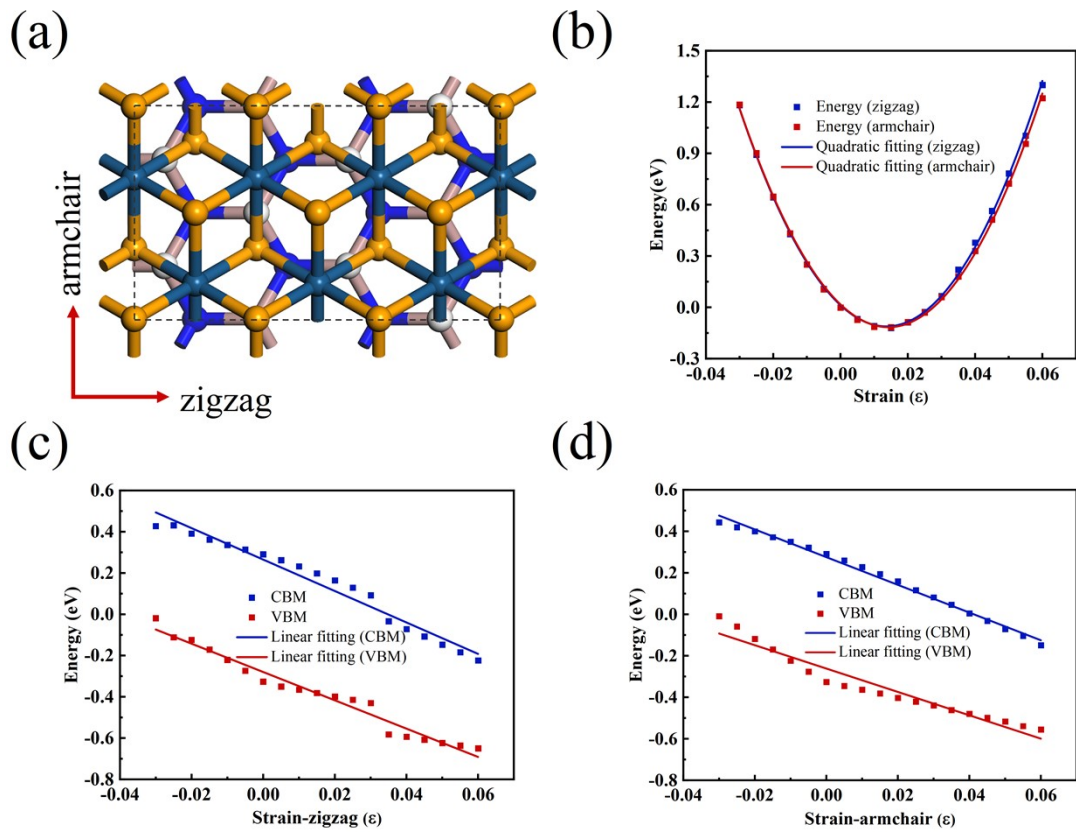

**Fig. S7.** (a) The carrier transport directions in the rectangular unit cell of Ga-3L. (b) The energy is a function of uniaxial strain and their quadratic fitting gives the elastic modulus. The total energy of systems without applied strain is defined as 0 eV. (c) and (d) The relationship between band edges and the uniaxial strain. Their linear fitting offers the deformational potential constant.
